# Supplementary material for: A single-source precursor route to anisotropic halogen-doped zinc oxide particles as a promising candidate for new transparent conducting oxide materials
Source: publisher site journal article supplement (doi:10.3762/bjnano.6.222), 2015-11-18
Supplement: Additional file 1 [file 2190-4286-6-222-S1.pdf]

## **Supporting Information**

for

# **A single-source precursor route to anisotropic halogen-doped zinc oxide particles as a promising candidate for new transparent conducting oxide materials**

Daniela Lehr<sup>1</sup>, Markus R. Wagner<sup>2</sup>, Johanna Flock<sup>3</sup>, Julian S. Reparaz<sup>2</sup>,  
Clivia M. Sotomayor Torres<sup>2,4</sup>, Alexander Klaiber<sup>1</sup>, Thomas Dekorsy<sup>3</sup> and Sebastian Polarz\*<sup>1</sup>

Address: <sup>1</sup>Department of Chemistry, University of Konstanz, 78457 Konstanz, Germany;  
<sup>2</sup>ICN2 Catalan Institute of Nanoscience and Nanotechnology, Campus UAB, 08193 Bellaterra  
(Barcelona), Spain; <sup>3</sup>Department of Physics, University of Konstanz, 78457 Konstanz,  
Germany and <sup>4</sup>Catalan Institute of Research and Advanced Studies (ICREA), Barcelona  
08010, Spain

Email: Sebastian Polarz\* - [sebastian.polarz@uni-konstanz.de](mailto:sebastian.polarz@uni-konstanz.de)

\*Corresponding author

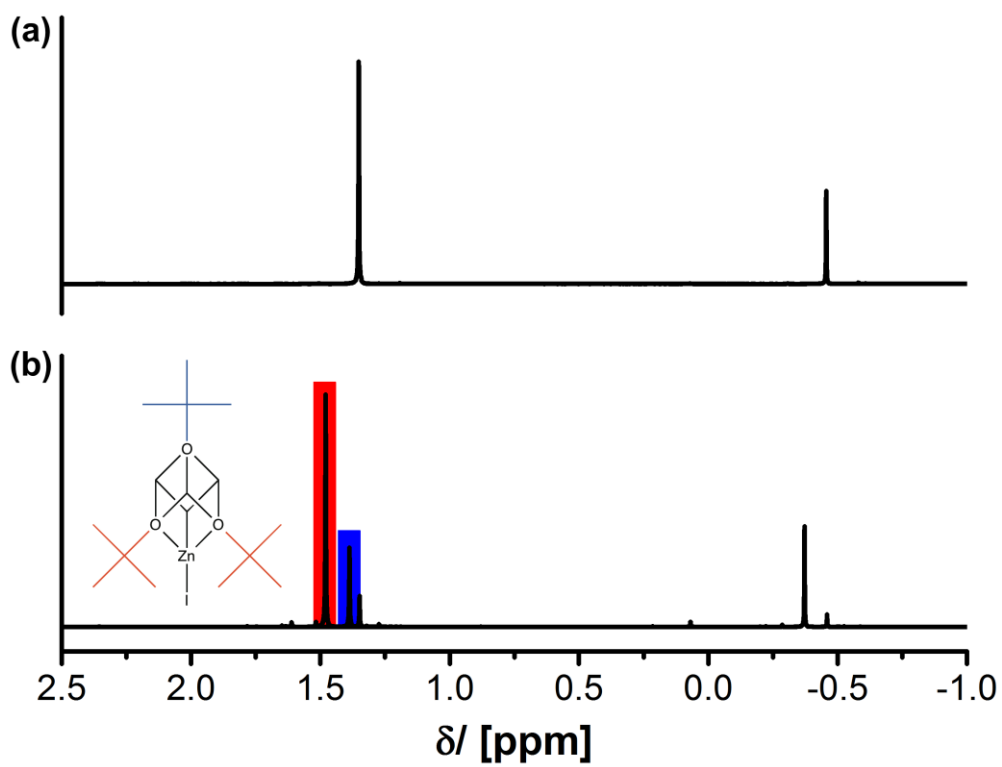

(c)

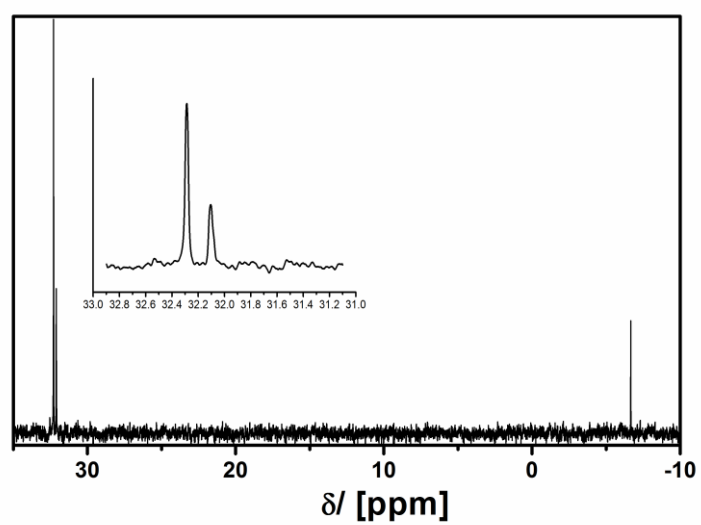

(d)

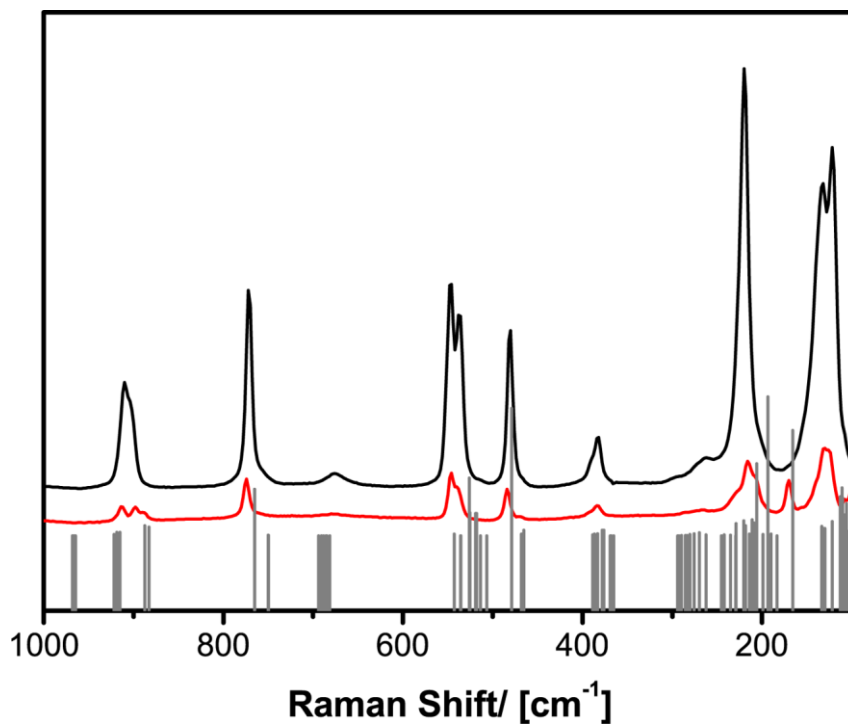

**Figure S1:** Additional analytical data for the molecular precursor compound **2a**. <sup>1</sup>H NMR (400 MHz, CDCl<sub>3</sub>) spectrum of the starting compound **1** [MeZnOt-Bu]<sub>4</sub> (a) and the monosubstituted iodo-compound **2a** [I(CH<sub>3</sub>)<sub>3</sub>Zn(Ot-Bu)<sub>4</sub>]. (c) <sup>13</sup>C NMR (400 MHz, CDCl<sub>3</sub>) spectrum of the monosubstituted iodo-compound **2a** [I(CH<sub>3</sub>)<sub>3</sub>Zn<sub>4</sub>(Ot-Bu)<sub>4</sub>]. (d) FT-Raman spectra of [MeZnOt-Bu]<sub>4</sub> (black) and [I(CH<sub>3</sub>)<sub>3</sub>Zn<sub>4</sub>(Ot-Bu)<sub>4</sub>] (**2a**) (red). Grey bars: DFT simulated vibration spectra of **2a**.

(a)

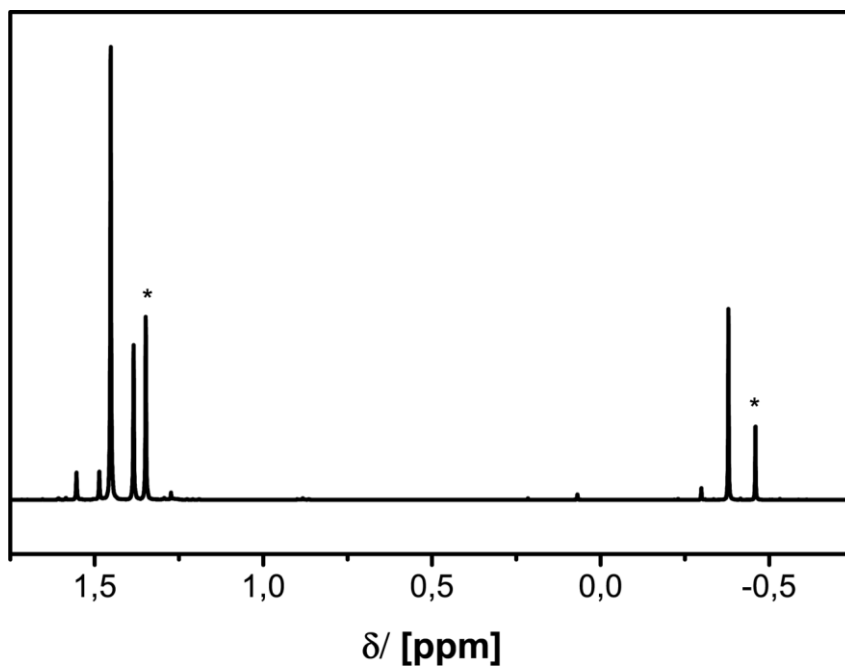

(b)

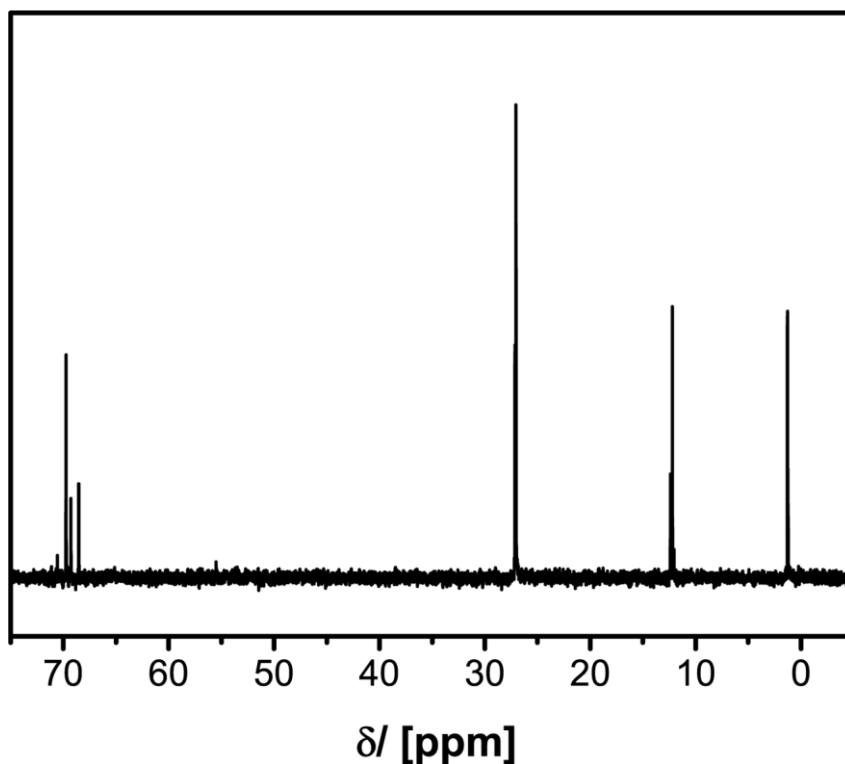

**Figure S2:** Additional analytical data for the molecular precursor compound **2b**. (a)  $^1\text{H}$  NMR (400 MHz,  $\text{CDCl}_3$ ) spectrum of the mono-substituted bromo-compound **2b**  $[\text{Br}(\text{CH}_3)_3\text{Zn}_4(\text{Ot-Bu})_4]$  (\*residual starting compound  $[\text{MeZnOt-Bu}]_4$ ). (b)  $^{13}\text{C}$  NMR (400 MHz,  $\text{CDCl}_3$ ) spectrum of the mono-substituted bromo-compound **2b**  $[\text{Br}(\text{CH}_3)_3\text{Zn}_4(\text{Ot-Bu})_4]$ .

(a)

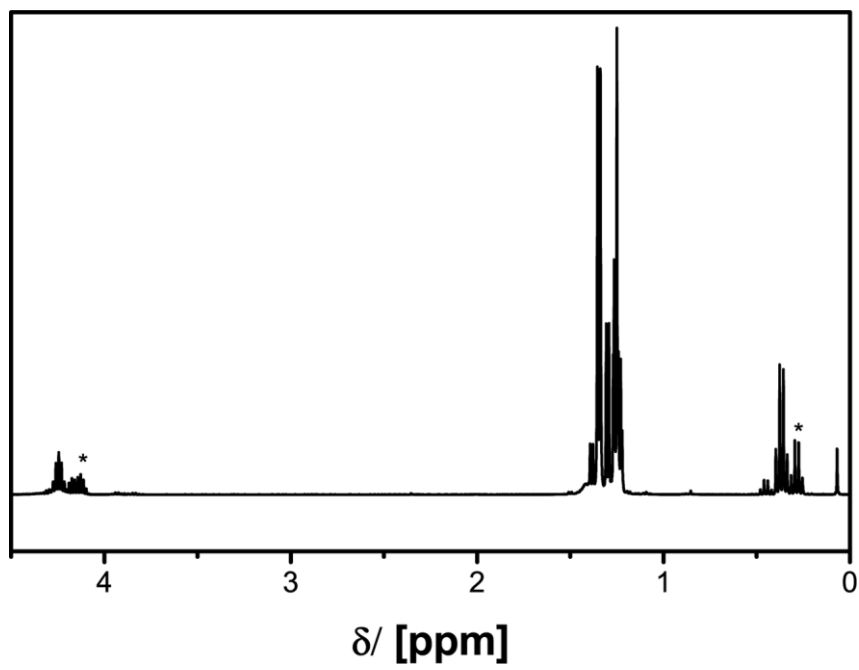

(b)

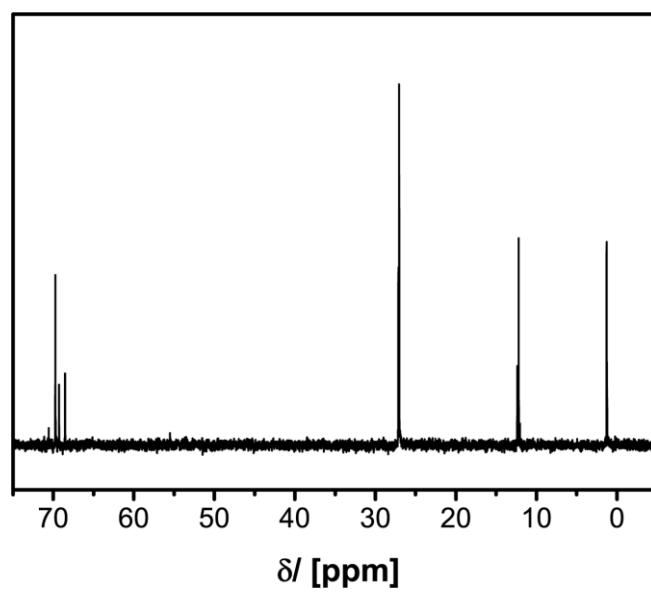

(c)

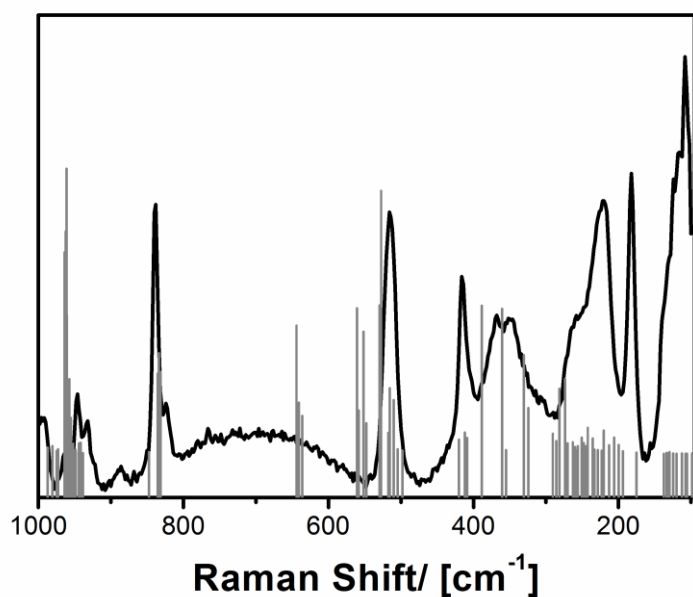

(d)

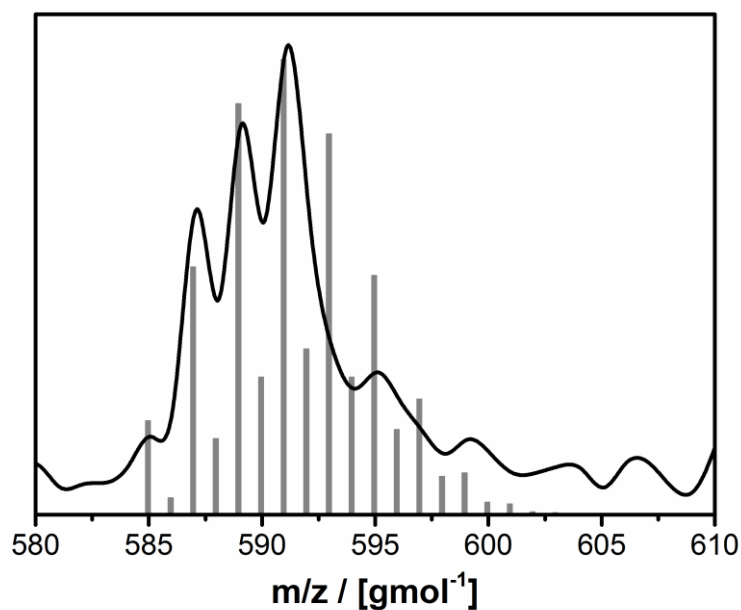

**Figure S3:** Additional analytical data for the molecular precursor compound **2c**. (a)  $^1\text{H}$  NMR (400 MHz,  $\text{CDCl}_3$ ) spectrum of the monosubstituted chloro-compound  $[\text{Cl}(\text{Et})_3\text{Zn}_4(\text{OiPr})_4]$  (**2c**) (\*residual starting compound  $[\text{EtZnOiPr}]_4$ ). (b)  $^{13}\text{C}$  NMR (400 MHz,  $\text{CDCl}_3$ ) spectrum of the monosubstituted chloro-compound  $[\text{Cl}(\text{Et})_3\text{Zn}_4(\text{OiPr})_4]$  (**2c**). (c) FT-Raman of  $[\text{Cl}(\text{Et})_3\text{Zn}_4(\text{OiPr})_4]$ ; experimental spectrum: black graph; spectrum simulated using DFT calculations: grey bars. EI-MS data (black graph: experimental signal) and calculated signal (grey bars) for the fragment  $[\text{Cl}(\text{Et})_2\text{Zn}(\text{OiPr})_4]^+$  ( $m/z = 591.5$ ).

(a)

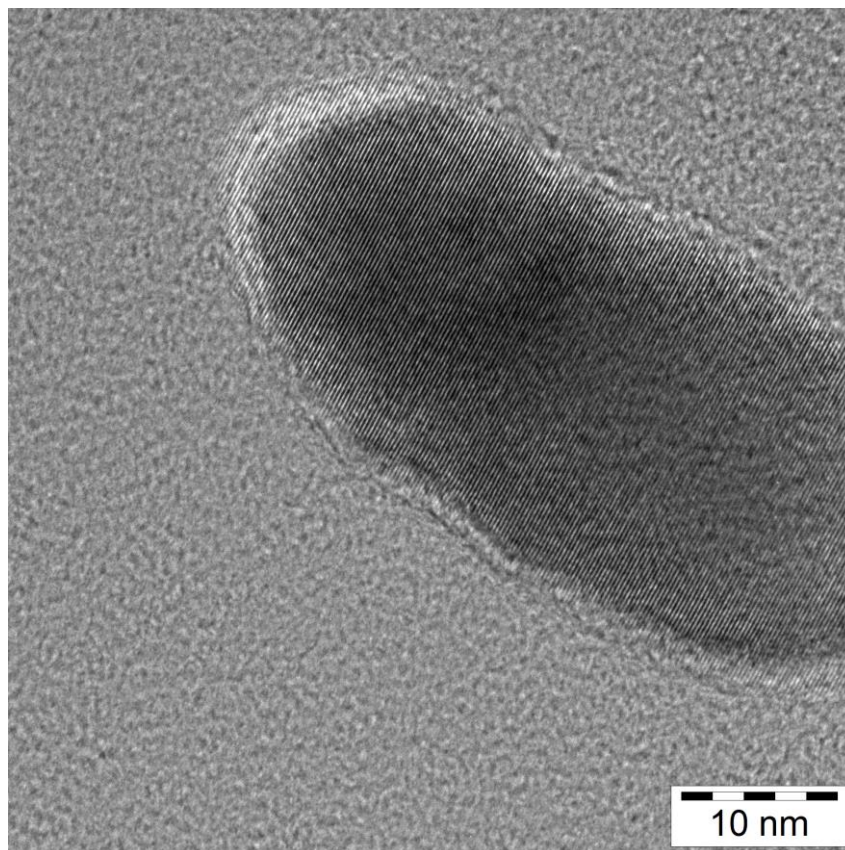

(b)

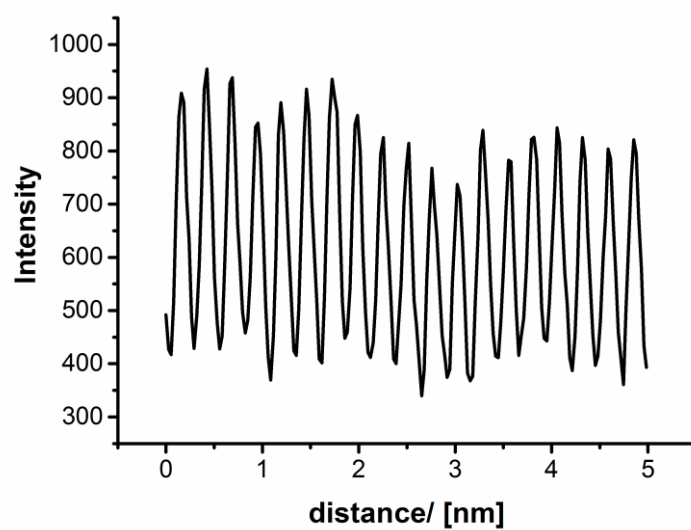

**Figure S4:** (a) HRTEM evaluation of ZnO<sub>1-x</sub>Cl<sub>x</sub>. (b) Evaluation of the lattice plane distances along *c*-direction from HR-TEM micrograph.

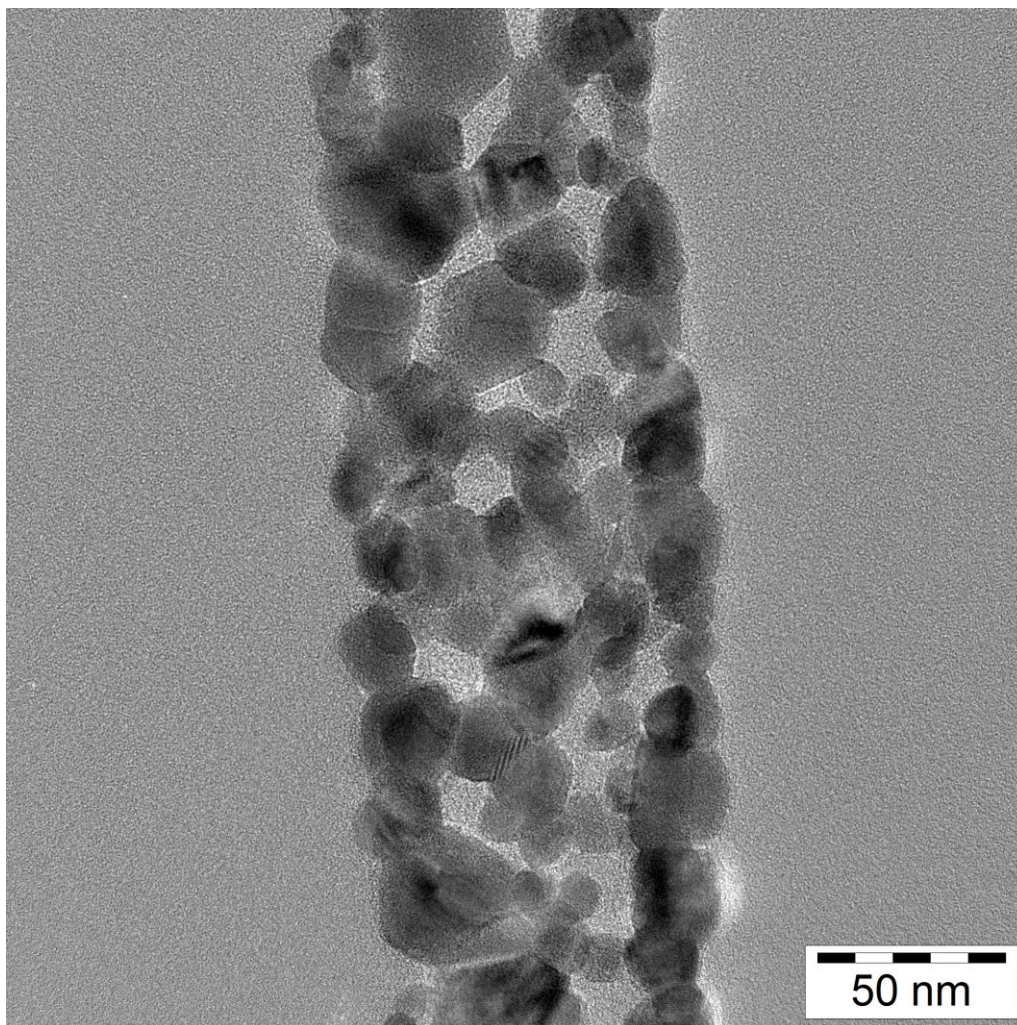

**Figure S5:** TEM micrograph of ZnO particles prepared from  $[\text{EtZnOiPr}]_4$  as a precursor.



(a)

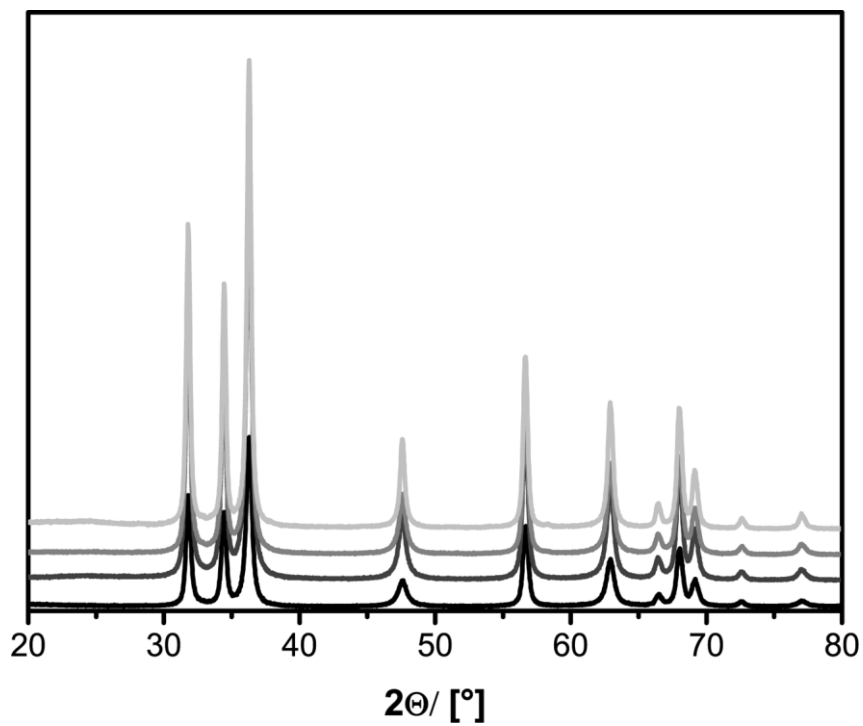

Composition and crystallite size of ZnO<sub>1-x</sub>Cl<sub>x</sub>

| $x$ in ZnO <sub>1-x</sub> Cl <sub>x</sub> | $D_{\text{cryst}[110]}$ [nm] |
|-------------------------------------------|------------------------------|
| 0.0                                       | 21.6                         |
| 1.4                                       | 25.1                         |
| 1.8                                       | 27.2                         |
| 2.5                                       | 37.1                         |

The crystallite size was calculated from the (110) diffraction signal using Scherrer equation.

(b)

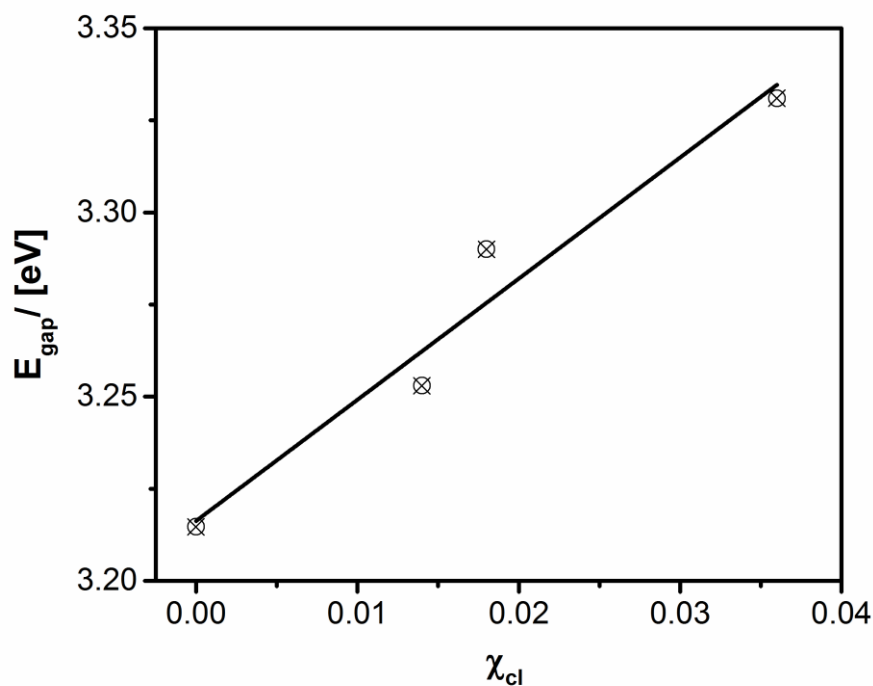

(c)

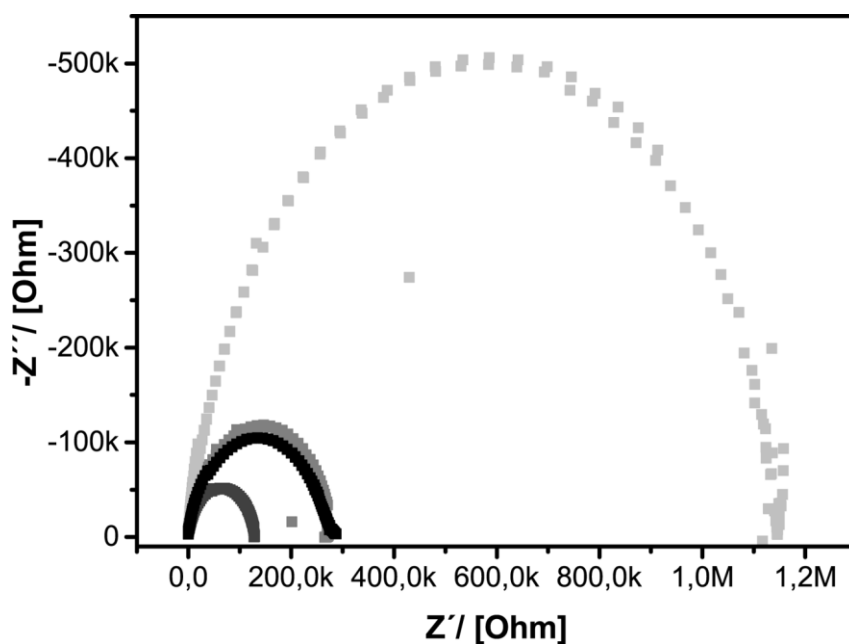

**Figure S6:**  $\text{ZnO}_{1-x}\text{Cl}_x$  materials with different doping concentrations. (a) PXRD of  $\text{ZnO}_{1-x}\text{Cl}_x$  materials synthesized from precursor mixtures of  $[\text{Et}_3\text{Cl}_1\text{Zn}_4(\text{OiPr})_4]$  (**2c**) and  $[\text{EtZnOiPr}]_4$ :  $x = 0.0\%$  (black),  $1.4\%$  (dark grey),  $1.8\%$  (grey) and  $2.5\%$  (light grey). (b) Correlation of  $E_{\text{gap}}$  determined from optical diffuse reflectance spectra and the mole fraction of chlorine. (c) Impedance spectra of  $\text{ZnO}_{1-x}\text{Cl}_x$  (Nyquist Plot):  $x = 0.0\%$  (black),  $1.4\%$  (dark grey),  $1.8\%$  (grey) and  $2.5\%$  (light grey).

(a)

| $T$ [°C]            | $x$ in $\text{ZnO}_{1-x}\text{I}_x$ | $D_{\text{cryst [110]}}$ [nm] |
|---------------------|-------------------------------------|-------------------------------|
| 200                 | 0.088                               | 7.7                           |
| 250                 | 0.024                               | 15.1                          |
| 300                 | 0.007                               | 15.7                          |
| 350                 | 0.005                               | 19.9                          |
| 350 (ZnO reference) | 0.000                               | 18.4                          |

(b)

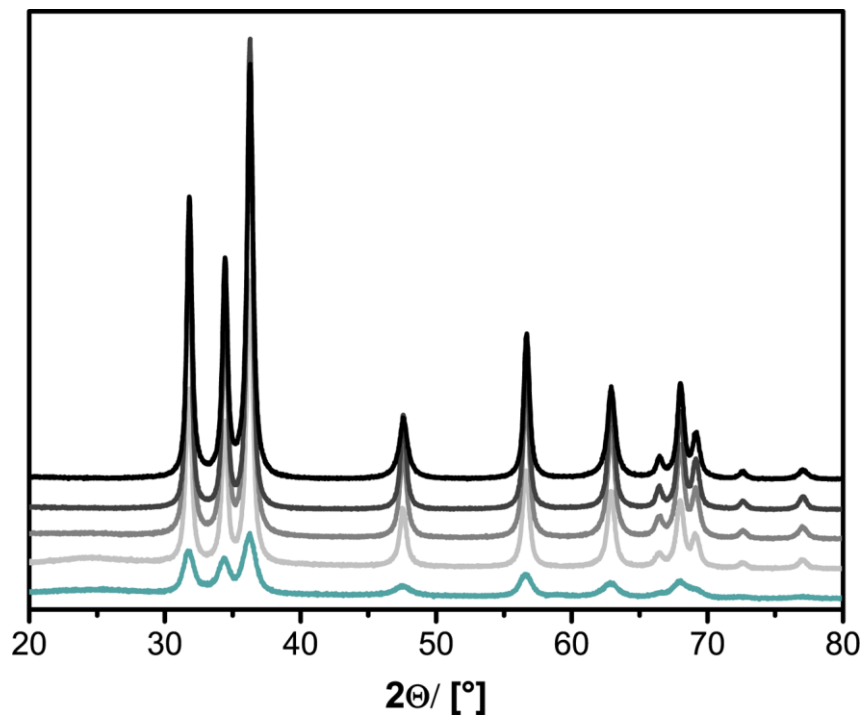

(c)

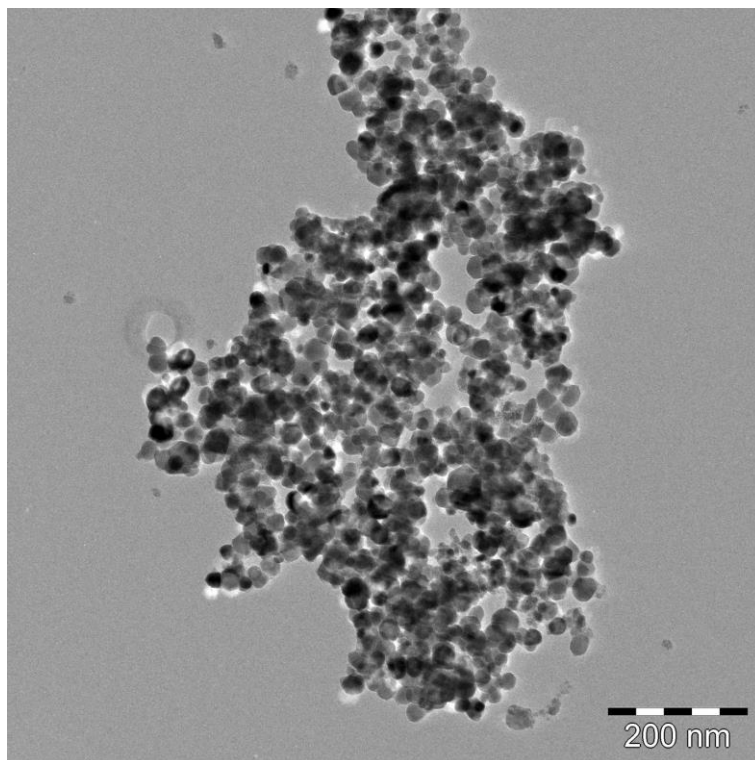

**Figure S7:**  $\text{ZnO}_{1-x}\text{I}_x$  materials prepared from precursor **2a**. (a)  $\text{ZnO}_{1-x}\text{I}_x$  synthesized from **2a** at different decomposition temperatures. (b) PXRD of  $\text{ZnO}_{1-x}\text{I}_x$  materials synthesized at different temperatures from  $[\text{Ime}_3\text{Zn}(\text{Ot-Bu})_4]$ : 200 °C (blue), 250 °C (light grey), 300 °C (grey) and 350 °C (darkgrey). Black: ZnO reference (prepared from  $[\text{MeZnOt-Bu}]_4$  at 350 °C). (c) TEM micrograph of  $\text{ZnO}_{1-x}\text{I}_x$  particles ( $x = 0.005$ ).

(a)

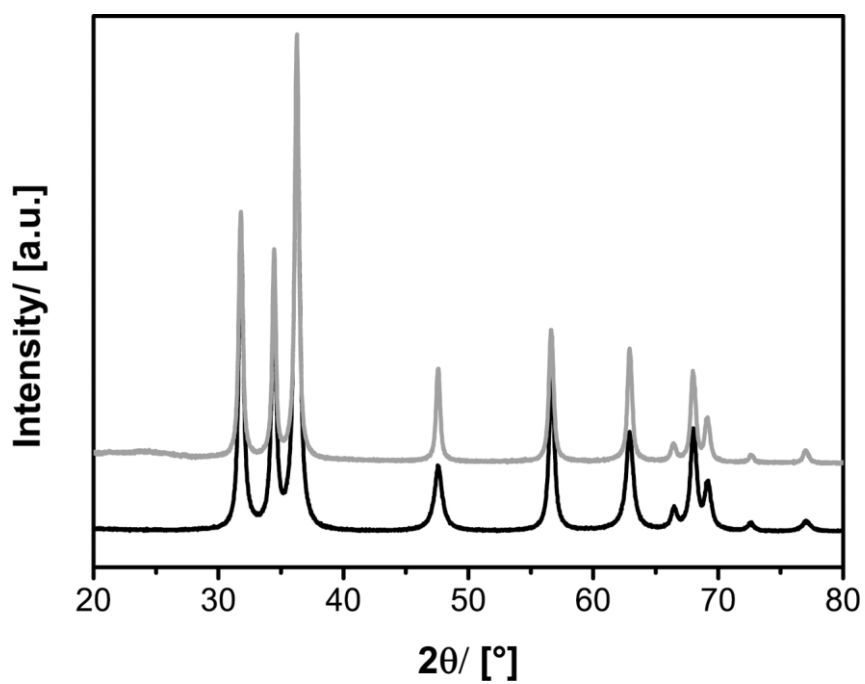

(b)

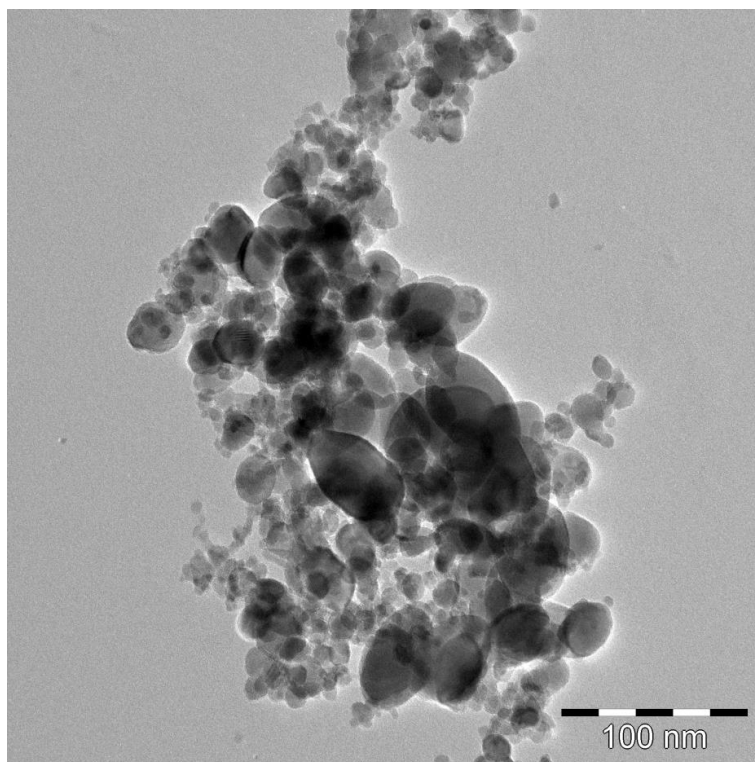

**Figure S8:**  $\text{ZnO}_{1-x}\text{Br}_x$  material prepared from precursor **2b**. (a) PXRD of  $\text{ZnO}_{1-x}\text{Br}_x$  ( $x = 0.022$ ) and ZnO reference (black) prepared at 350 °C. (b) TEM micrograph of  $\text{ZnO}_{1-x}\text{Br}_x$  particles.
